# Supplementary material for: Metal-Organic Framework-Derived Atomically Dispersed Co-N-C Electrocatalyst for Efficient Oxygen Reduction Reaction
Source: MDPI journal article supplement (doi:10.3390/catal12111462), 2022-11-18
Supplement: s1 [file s1]

## *Supplementary Information*

# **Metal-Organic Framework-Derived Atomically Dispersed Co-N-C Electrocatalyst for Efficient Oxygen Reduction Reaction**

Dongqi Ge <sup>1,2</sup>, Longfei Liao <sup>2,3,\*</sup>, Mingyu Li <sup>3</sup> and Yongli Yin <sup>2</sup>

<sup>1</sup> School of Chemical Engineering, Guangdong University of Petrochemical Technology, Maoming 525000, China

<sup>2</sup> Space Science and Technology Institute (Shenzhen), Shenzhen 518117, China

<sup>3</sup> School of Materials Science and Engineering, Harbin Institute of Technology (Shenzhen), Shenzhen 518055, China

\* Correspondence: liaolongfei123@126.com

## **XPS analysis**

In a survey spectrum, the peak area is characterized using a quantification table based upon values computed from regions. The primary objectives of the quantification region are to define the range of energies over which the signal can be attributed to the transition of interest and to specify the type of approximation appropriate for the removal of background signals not belonging to the peak. Then, the elemental contents are extracted from the survey spectrum based on peak areas.

The high-resolution spectra were collected with a narrow banding energy range focused on one element. Moreover, an increased dwell time and sweep numbers were applied to the high-resolution spectra.

The curve fitting was conducted using CasaXPS software, with a model created from a set of Gaussian/Lorentzian line shapes. Peak models were created using the Components property page on the Quantification Parameters dialog window. A range of line shapes is available for constructing the peak models including both symmetric and asymmetric functional forms.

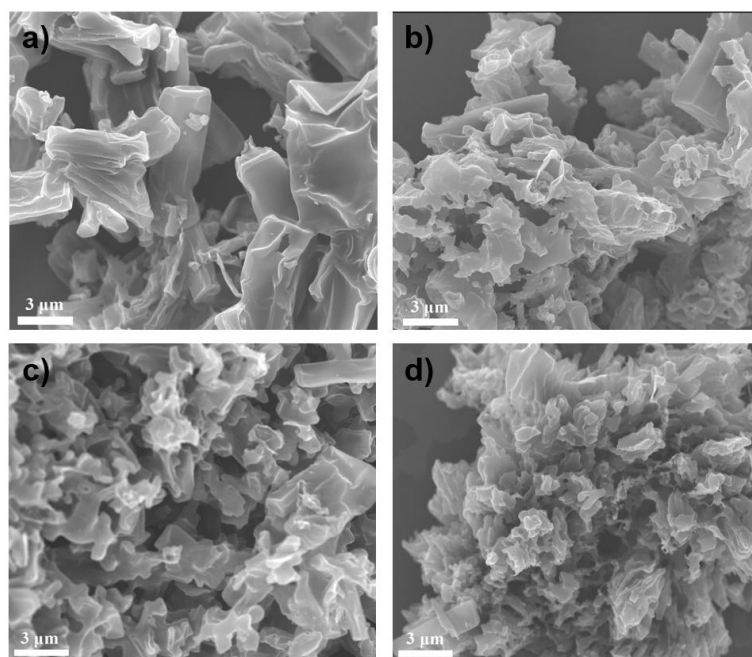

**Figure S1.** SEM images of (a) N-C, (b) Co-N-C-1, (c) Co-N-C-2, and (d) Co-N-C-3.

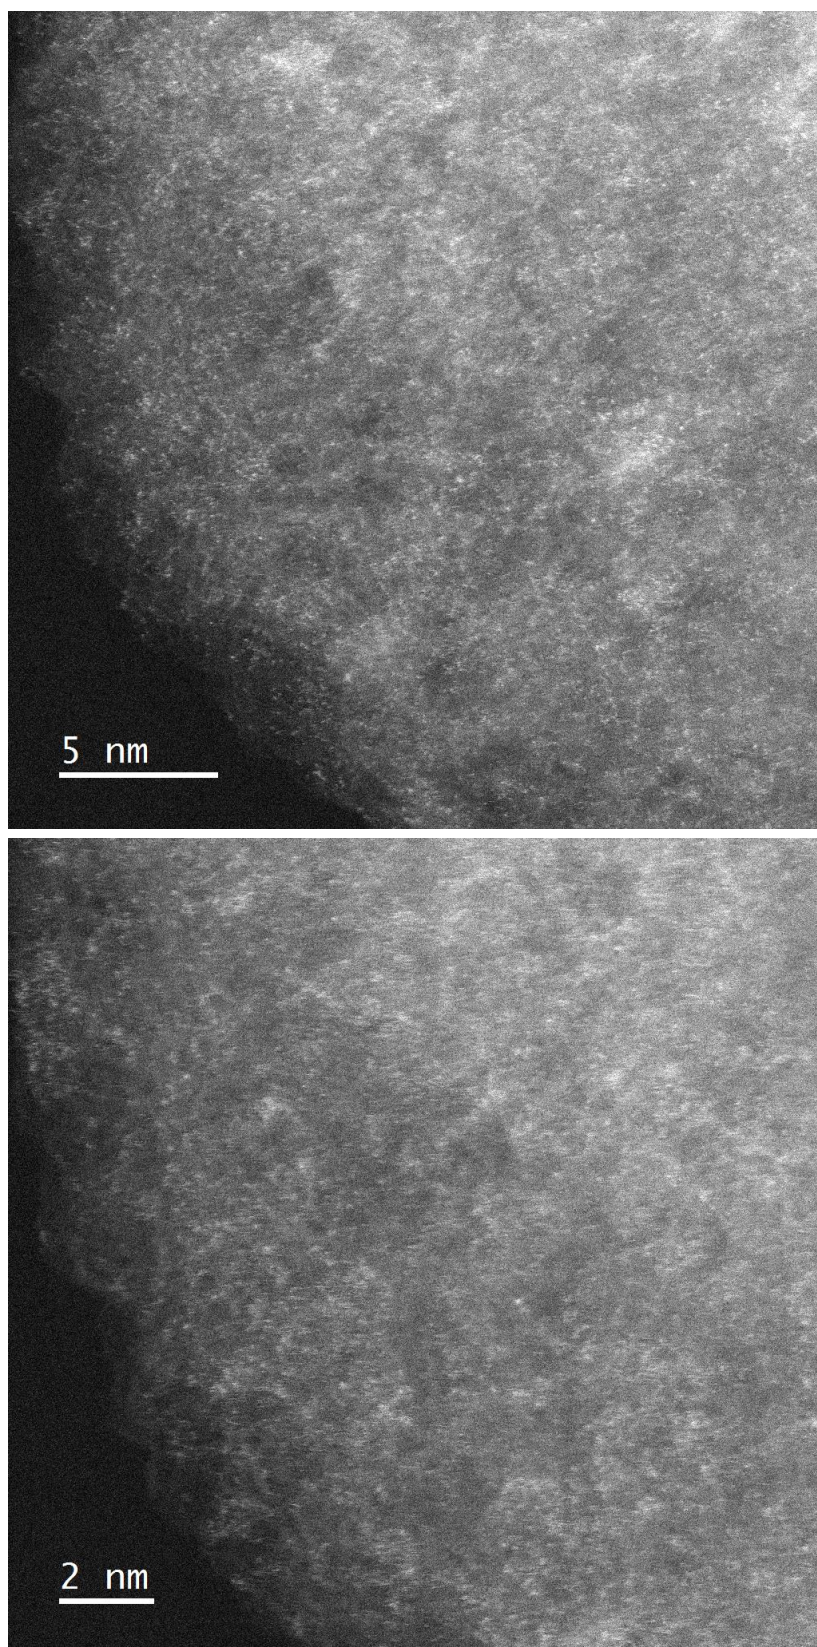

**Figure S2.** HAADF-STEM images of the Co-N-C-2 catalyst.

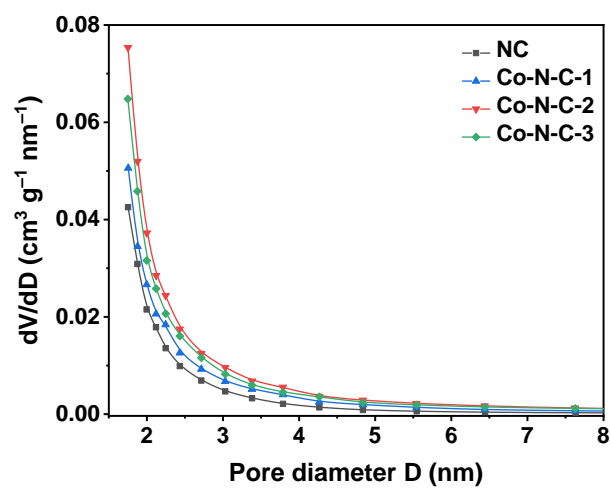

**Figure S3.** Pore size distribution of the obtained NC and Co-N-C catalysts.

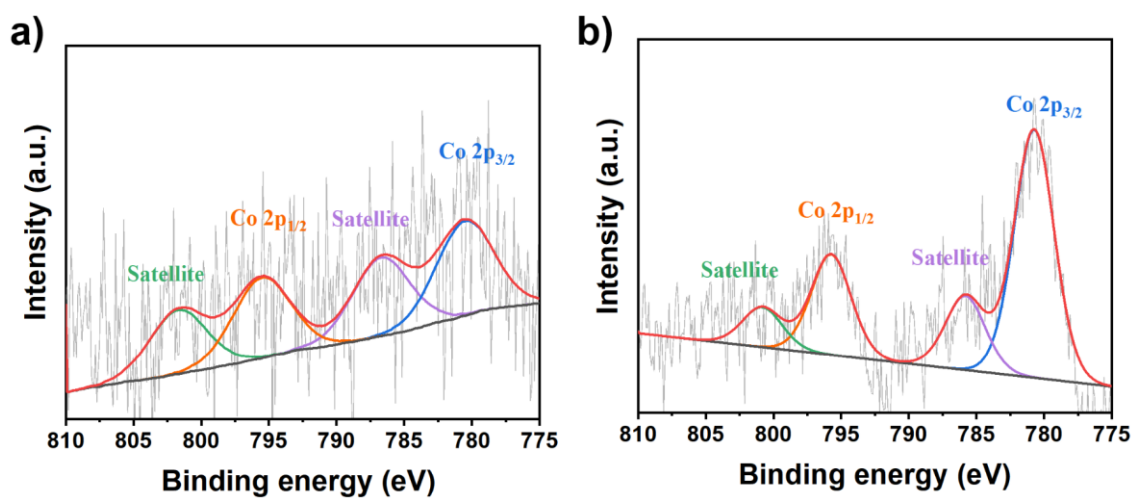

**Figure S4.** Co 2p peaks and fitting results of (a) Co-N-C-1 and (b) Co-N-C-3.

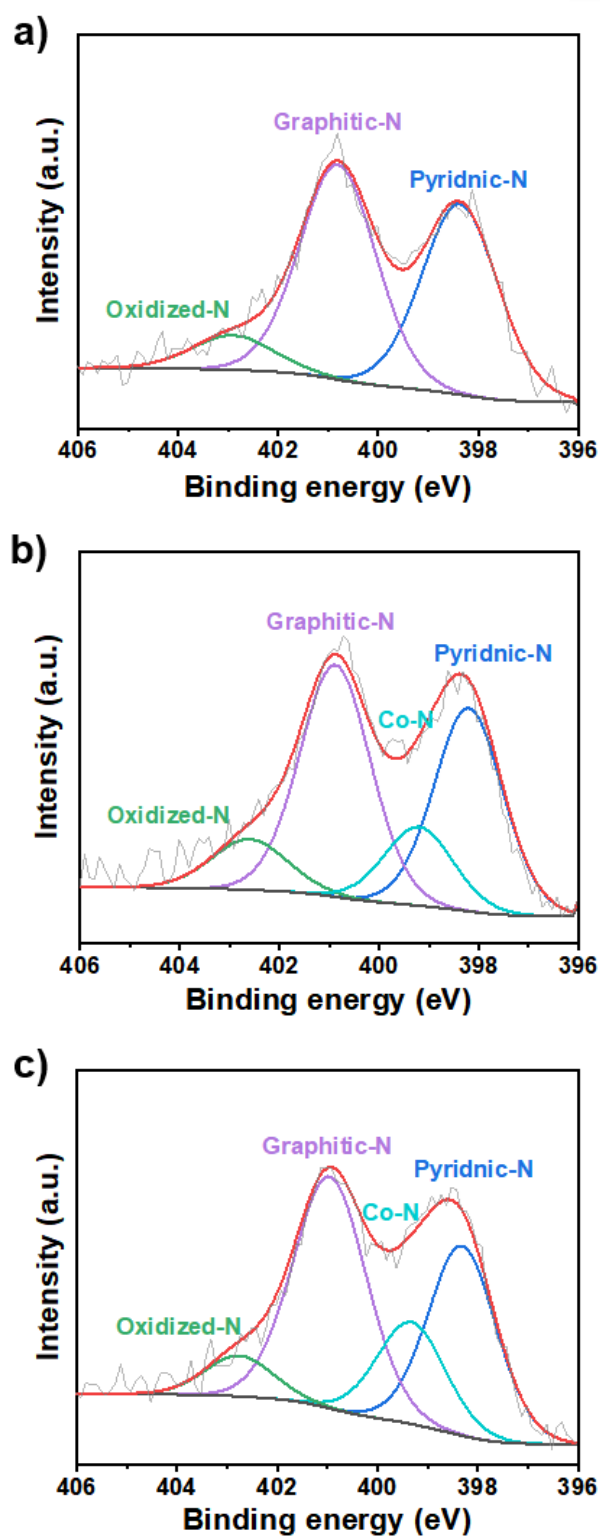

**Figure S5.** N 1s peaks and fitting results of (a) N-C, (b) Co-N-C-1, and (c) Co-N-C-3.

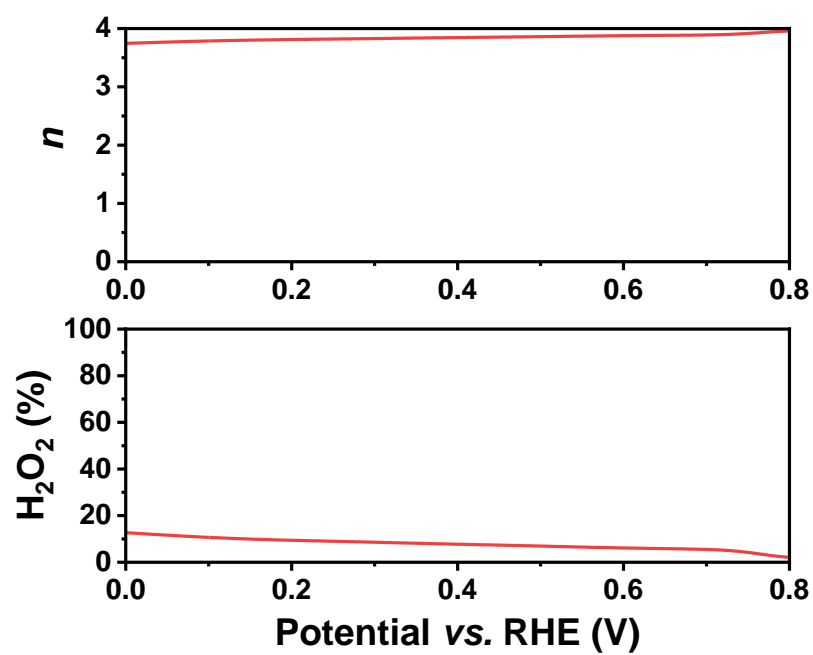

**Figure S6.** Yield of hydrogen peroxide (%) and electron transfer number of the Co-N-C-2 catalyst toward ORR.



**Table S1.** Pore features of the N-C and Co-N-C catalysts.

| Sample   | $A_{\text{BET}}$ (m <sup>2</sup> g <sup>-1</sup> ) | $A_{\text{Micro}}$ (m <sup>2</sup> g <sup>-1</sup> ) | $A_{\text{Meso}}$ (m <sup>2</sup> g <sup>-1</sup> ) |
|----------|----------------------------------------------------|------------------------------------------------------|-----------------------------------------------------|
| N-C      | 840                                                | 785                                                  | 55                                                  |
| Co-N-C-1 | 888                                                | 816                                                  | 72                                                  |
| Co-N-C-2 | 1076                                               | 976                                                  | 100                                                 |
| Co-N-C-3 | 1003                                               | 913                                                  | 90                                                  |

**Table S2.** Surface elemental composition (wt.%) of the obtained materials measured by XPS.

| Sample   | C     | N    | O    | Zn   | Co   |
|----------|-------|------|------|------|------|
| N-C      | 87.23 | 3.71 | 8.58 | 0.49 | -    |
| Co-N-C-1 | 87.29 | 3.87 | 7.42 | 0.76 | 0.66 |
| Co-N-C-2 | 85.07 | 5.31 | 7.44 | 1.20 | 0.98 |
| Co-N-C-3 | 86.32 | 4.48 | 6.65 | 0.93 | 1.61 |

**Table S3.** Content of each nitrogen component (%) of the N-C and Co-N-C catalysts.

| Sample   | Pyridinic-N | Co-N  | Graphitic-N | Oxide-N |
|----------|-------------|-------|-------------|---------|
| N-C      | 43.12       | -     | 48.56       | 8.32    |
| Co-N-C-1 | 35.32       | 13.68 | 41.29       | 9.70    |
| Co-N-C-2 | 33.93       | 17.86 | 41.07       | 7.14    |
| Co-N-C-3 | 32.63       | 17.54 | 42.83       | 7.00    |

**Table S4.** Comparison of the ORR catalytic performance of the Co-N-C-2 SACs catalyst and the other M-N-C catalysts reported in the literature in 0.1 M KOH.

| Catalysts                                   | $E_{\text{onset}}$ (V vs. RHE) | $E_{1/2}$ (V vs. RHE) | References       |
|---------------------------------------------|--------------------------------|-----------------------|------------------|
| <b>Co-N-C-2</b>                             | <b>0.96</b>                    | <b>0.89</b>           | <b>This work</b> |
| Co-BM-800                                   | 0.89                           | 0.82                  | [1]              |
| SSM/Co <sub>4</sub> N/CoNC                  | 0.91                           | 0.83                  | [2]              |
| FeNC-TPTZ <sub>0.5</sub> DAN <sub>0.5</sub> | 1.03                           | 0.90                  | [3]              |
| Fe-PpPD-800                                 | 1.01                           | 0.89                  | [4]              |
| Hm-LDH-700                                  | 1.13                           | 0.86                  | [5]              |
| CoO/Co-N-C/MC                               | 0.90                           | 0.78                  | [6]              |
| OLC/Co-N-C                                  | 0.93                           | 0.86                  | [7]              |
| Co/N-C <sub>Zn</sub>                        | 0.96                           | 0.88                  | [8]              |
| Co-N-C(A)                                   | 1.01                           | 0.89                  | [9]              |
| Co-N-PC-800                                 | 1.12                           | 0.83                  | [10]             |
| CoO/Co/N-C-10-700                           | 0.97                           | 0.92                  | [11]             |
| CoO <sub>x</sub> /Co-N-C (800)              | 0.95                           | 0.88                  | [12]             |
| Co/C-N@CNFs                                 | 0.95                           | 0.85                  | [13]             |
| Co@NC-5                                     | 0.95                           | 0.86                  | [14]             |
| Co@NCB                                      | 0.93                           | 0.85                  | [15]             |
| Co-pyridinic N-C                            | 0.99                           | 0.87                  | [16]             |
| Co@Co-N-C-A NHs                             | 0.98                           | 0.85                  | [17]             |
| CoSAs/PTF-600                               | 0.92                           | 0.81                  | [18]             |
| Co-N-C-900                                  | 0.93                           | 0.88                  | [19]             |
| C-MOF-C2-900                                | 0.91                           | 0.82                  | [20]             |

## References

- [1] Y. X. Dai, W. L. Xin, L. H. Xu, J. Li, Y. X. Li, J. Li, S. Cosnier, X. J. Zhang, R. S. Marks, D. Shan, *Appl. Surf. Sci.*, **2022**, 591, 153066.
- [2] T. Liu, S. Zhao, Y. Wang, J. Yu, Y. Dai, J. Wang, X. Sun, K. Liu, M. Ni, *Small*, **2022**, 18, 2105887.
- [3] X. Xiang, X. R. Zhang, B. W. Yan, K. Wang, Y. Q. Wang, D. D. Lyu, S. B. Xi, Z. Q. Tian, P. K. Shen, *Chem. Eng. J.*, **2022**, 440, 135721.
- [4] Y. Hong, L. Li, B. Huang, X. Tang, W. Zhai, T. Hu, K. Yuan, Y. Chen, *Small*, **2022**, 18, 2106122.
- [5] Z. Yang, X. Yan, Z. Tang, W. Peng, J. Zhang, Y. Tong, J. Li, J. Zhang, *Appl. Surf. Sci.*, **2022**, 573, 151505.
- [6] X. H. Wan, X. M. Guo, M. T. Duan, J. Shi, S. J. Liu, J. H. Zhang, Y. J. Liu, X. J. Zheng, Q. H. Kong, *Electrochim. Acta*, **2021**, 394, 139135.
- [7] Z. Liang, N. Kong, C. Yang, W. Zhang, H. Zheng, H. Lin, R. Cao, *Angew. Chem. Int. Ed.*, **2021**, 60, 12759.
- [8] D. Zhang, P. P. Sun, Q. Zhou, B. Li, Y. G. Wei, T. Gong, N. Huang, X. W. Lv, L. Fang, X. H. Sun, *Appl. Surf. Sci.*, **2021**, 542, 148700.
- [9] J. Gao, Y. Hu, Y. Wang, X. Lin, K. Hu, X. Lin, G. Xie, X. Liu, K. M. Reddy, Q. Yuan, H. J. Qiu, *Small*, **2021**, 17, 2104684.
- [10] W. H. Zhou, Y. Li, L. C. Zheng, J. Liu, R. R. Tang, K. J. Shi, Y. Y. Zhang, *CrystEngComm*, **2021**, 23, 4930.

- [11] H. M. Du, F. F. Ding, L. Gu, J. S. Zhao, X. X. Zhang, K. G. Qu, Y. W. Li, T. Y. Lan, J. Li, Y. Zhang, Y. Qin, W. Y. Lu, *J. Alloy. Compd.*, **2021**, 885, 161174.
- [12] Y. Y. Fu, D. W. Xu, Y. F. Wang, X. H. Li, Z. B. Chen, K. Li, Z. F. Li, L. R. Zheng, X. Zuo, *ACS Sustain. Chem. Eng.*, **2020**, 8, 8338.
- [13] H. Meng, Y. Liu, H. Liu, S. Pei, X. Yuan, H. Li, Y. Zhang, *ACS Appl. Mater. Interfaces*, **2020**, 12, 41580.
- [14] M. Y. Tan, Y. Y. Xiao, W. H. Xi, X. F. Lin, B. F. Gao, Y. L. Chen, Y. Zheng, B. Z. Lin, *J. Power Sources*, **2021**, 490, 229570.
- [15] H. Zhong, C. Shi, J. Li, R. Yu, Q. Yu, H. Liu, Y. Yao, J. Wu, L. Zhou, L. Mai, *Chem. Commun.*, **2020**, 56, 4488.
- [16] Y. Ha, B. Fei, X. X. Yan, H. B. Xu, Z. L. Chen, L. X. Shi, M. S. Fu, W. Xu, R. B. Wu, *Adv. Energy Mater.*, **2020**, 10, 2002592.
- [17] S. L. Zhao, J. Yang, M. Han, X. M. Wang, Y. Lin, R. Yang, D. D. Xu, N. E. Shi, Q. Wang, M. J. Yang, Z. H. Dai, J. C. Bao, *Appl. Catal. B: Environ.*, **2020**, 260, 118207.
- [18] J. D. Yi, R. Xu, G. L. Chai, T. Zhang, K. T. Zang, B. Nan, H. Lin, Y. L. Liang, J. Q. Lv, J. Luo, R. Si, Y. B. Huang, R. Cao, *J. Mater. Chem. A*, **2019**, 7, 1252.
- [19] C. Zhu, Q. Shi, B. Z. Xu, S. Fu, G. Wan, C. Yang, S. Yao, J. Song, H. Zhou, D. Du, S. P. Beckman, D. Su, Y. Lin, *Adv. Energy Mater.*, **2018**, 8, 1801956.
- [20] M. Zhang, Q. Dai, H. Zheng, M. Chen, L. Dai, *Adv. Mater.*, **2018**, 30, 1705431.
